# Supplementary material
Source: MDPI journal article supplement (https://www.mdpi.com/1996-1073/16/3/1551)
Supplement: s1 [file s1]

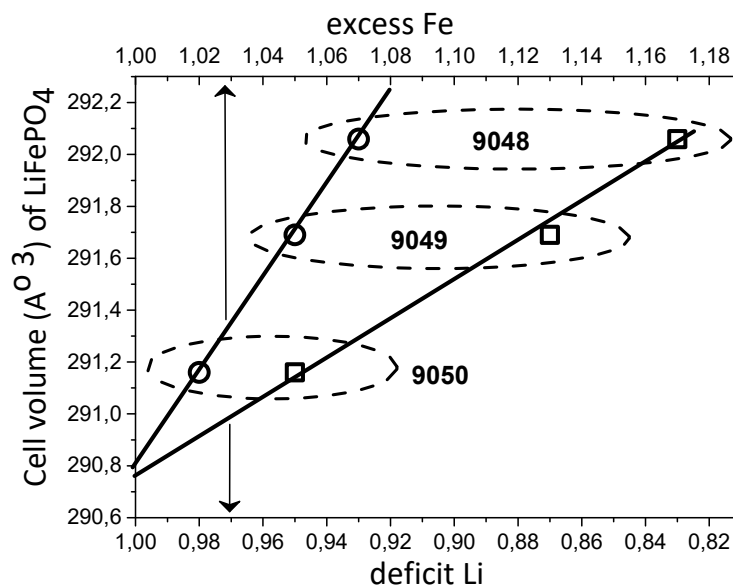

**Figure S1.** The dependence of the LiFePO<sub>4</sub> orthorhombic olivine structure unit cell volume on the values of Li deficiency and Fe excess relative to the stoichiometric composition according to ICDD identification 01-083-9048, 01-083-9049, 01-083-9050, their numbers are indicated. [1]

[1] Jensen, K.M.Ø.; Christensen, M.; Gunnlaugsson, H.P.; Lock, N.; Bøjesen, E.D.; Proffen, T.; Iversen, B.B. Defects in Hydrothermally Synthesized LiFePO<sub>4</sub> and LiFe<sub>1-x</sub>Mn<sub>x</sub>PO<sub>4</sub> Cathode Materials. *Chem. Mater.* **2013** *25*, 2282–2290. [dx.doi.org/10.1021/cm4008393](https://doi.org/10.1021/cm4008393)

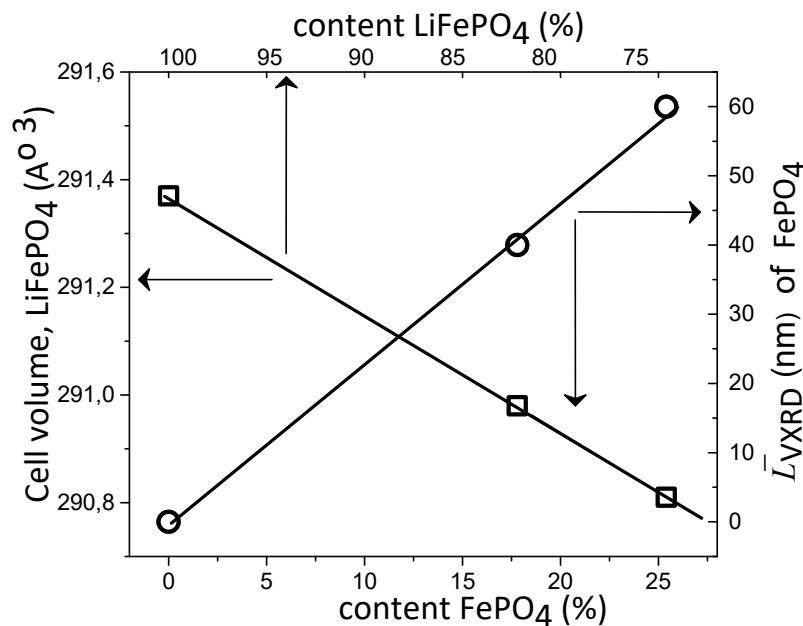

**Figure S2.** The results of XRD measurements of N1 test cathode depending on its discharge degree. The left ordinate is the volume of the unit cell of non-discharged LiFePO<sub>4</sub> crystallites, the right ordinate is the average size of the discharged FePO<sub>4</sub> crystallites.

## Section S1. SEM and EDX studies of samples before and after 100-fold cycling of test cathodes made from developed and commercial powders

SEM JSM-7001F with Energy Dispersive X-Ray Analysis (EDX) is used.

1 smpl. Before

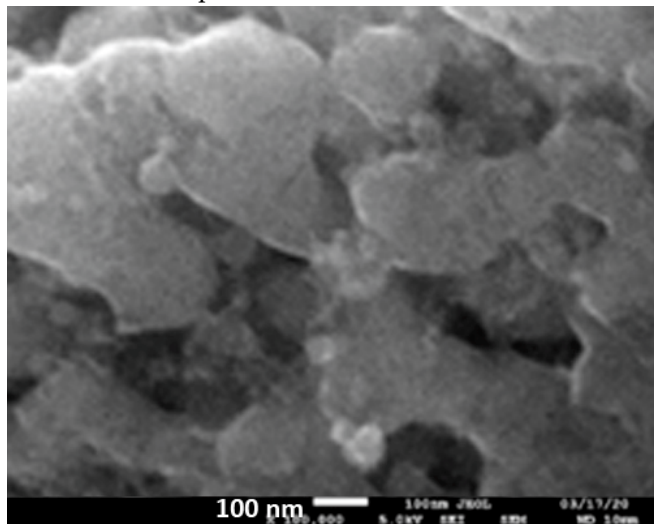

1 smpl. After

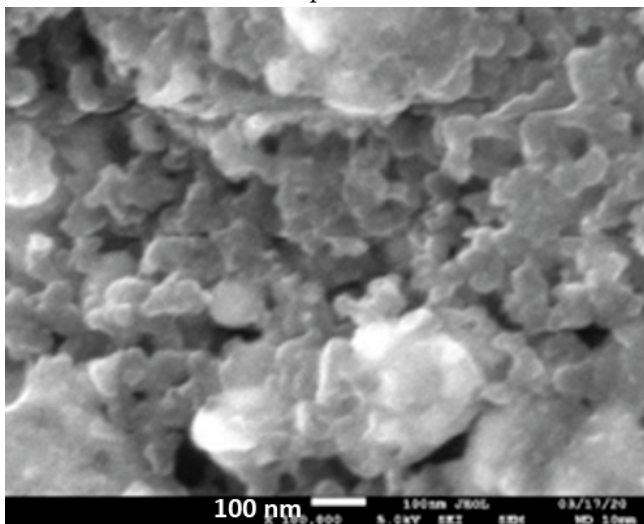

1 smpl. Before

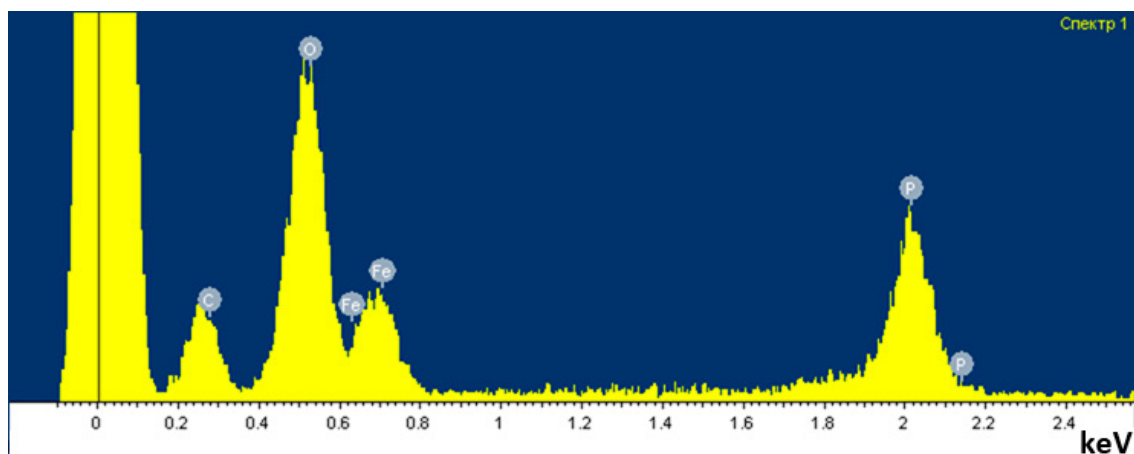

| Element | Conv. | Intensity Correct. | Weight % | Sigma | Atomic % |
|---------|-------|--------------------|----------|-------|----------|
| C K     | 13.39 | 0.7228             | 21.62    | 1.13  | 38.41    |
| O K     | 31.44 | 1.3085             | 28.06    | 1.01  | 37.42    |
| P K     | 9.46  | 0.6859             | 16.10    | 0.68  | 11.09    |
| Fe K    | 23.99 | 0.8184             | 34.22    | 1.81  | 13.07    |
| Total   |       |                    | 100.00   |       |          |

1 smpl. After

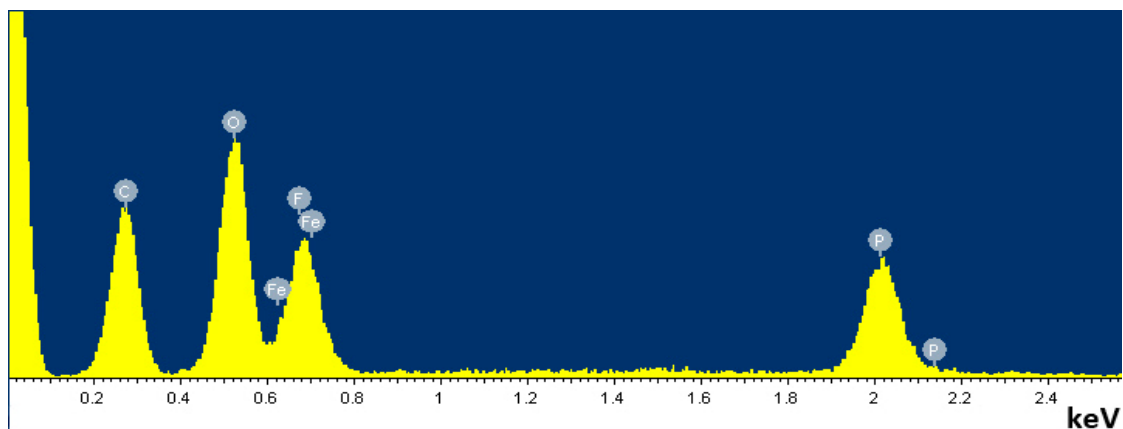

| Element | Conv. | Intensity Correct. | Weight % | Weight % Sigma | Atomic % |
|---------|-------|--------------------|----------|----------------|----------|
| t       | Conc. |                    |          |                |          |
| C K     | 31.94 | 0.8478             | 31.05    | 0.71           | 46.12    |
| O K     | 34.60 | 1.1970             | 23.82    | 0.54           | 26.57    |
| F K     | 11.93 | 0.6260             | 15.71    | 0.74           | 14.75    |
| P K     | 10.02 | 0.6717             | 12.30    | 0.34           | 7.08     |
| Fe K    | 16.17 | 0.7781             | 17.12    | 1.07           | 5.47     |
| Total   |       |                    | 100.00   |                |          |

3 smpl. Before

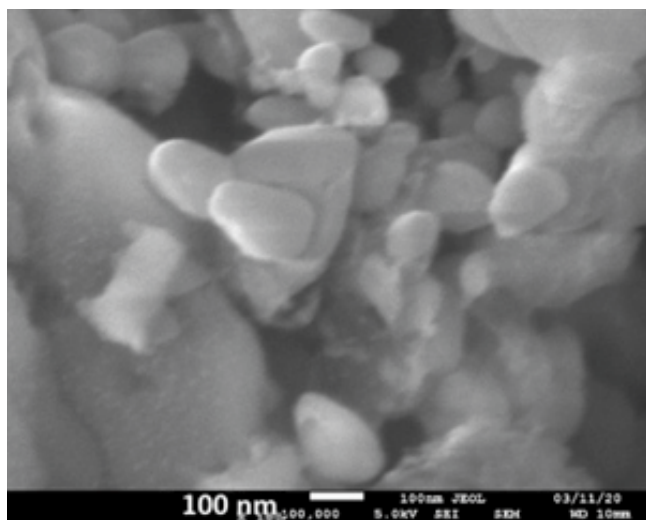

3 smpl. After

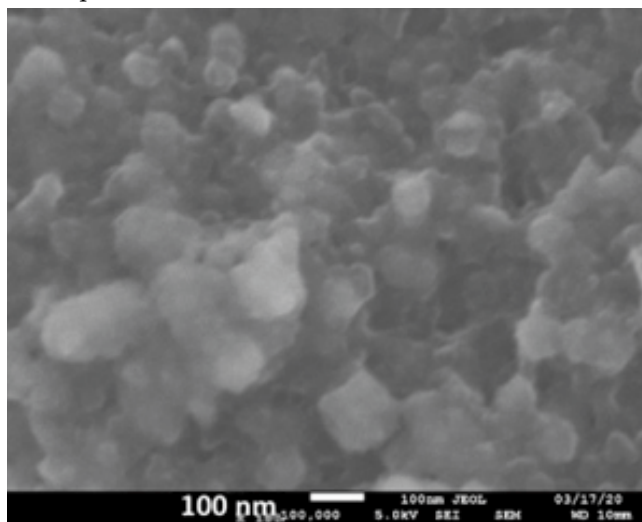

3 smpl. Before

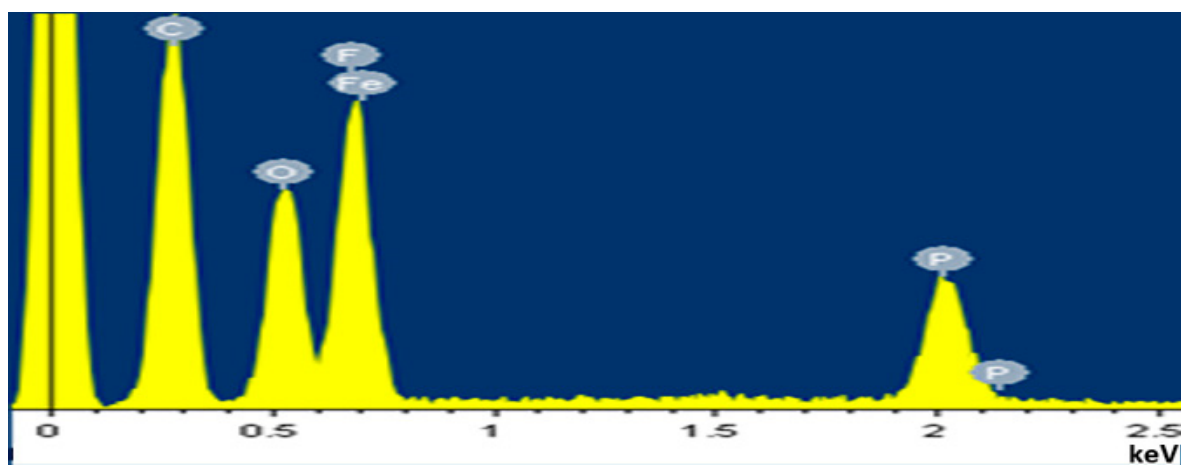

| Element | Conv<br>Conc. | Intensity<br>Correct. | Weight % | Weight %<br>Sigma | Atomic % |
|---------|---------------|-----------------------|----------|-------------------|----------|
| C K     | 25.86         | 0.8343                | 38.10    | 1.35              | 57.31    |
| O K     | 21.00         | 1.0890                | 23.73    | 0.97              | 26.80    |
| P K     | 7.47          | 0.6754                | 13.60    | 0.63              | 7.94     |
| Fe K    | 15.66         | 0.7838                | 24.58    | 1.92              | 7.95     |
| Total   |               |                       | 100.00   |                   |          |

3 smpl. After

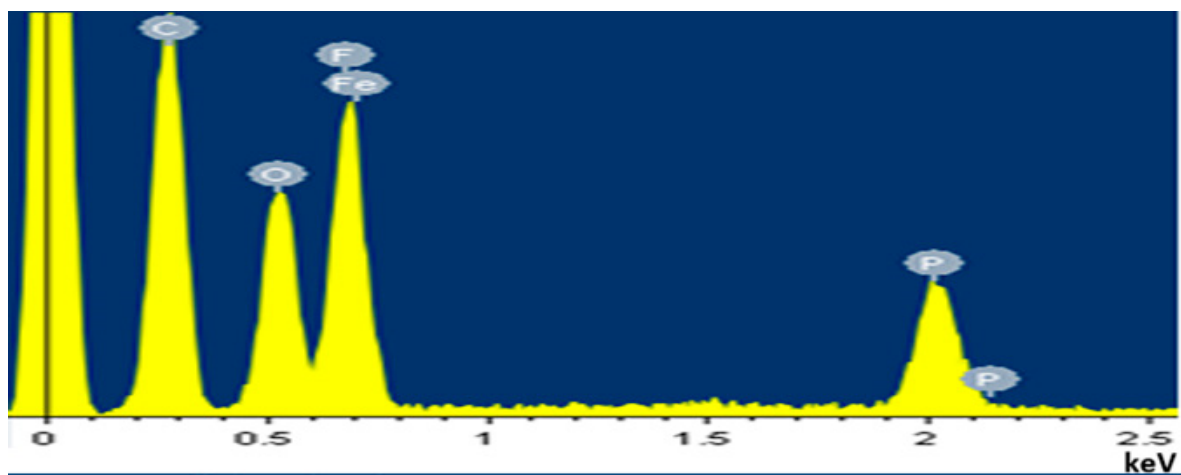

| Element | Conv<br>Conc. | Intensity<br>Correct. | Weight % | Weight %<br>Sigma | Atomic % |
|---------|---------------|-----------------------|----------|-------------------|----------|
| C K     | 42.00         | 0.9837                | 39.41    | 0.78              | 53.74    |
| O K     | 19.14         | 1.1051                | 16.00    | 0.46              | 16.38    |
| F K     | 18.52         | 0.6604                | 25.92    | 0.75              | 22.34    |
| P K     | 6.27          | 0.6640                | 8.73     | 0.30              | 4.61     |
| Fe K    | 8.18          | 0.7598                | 9.94     | 1.08              | 2.92     |
| Total   |               |                       | 100.00   |                   |          |

4 smpl. Before

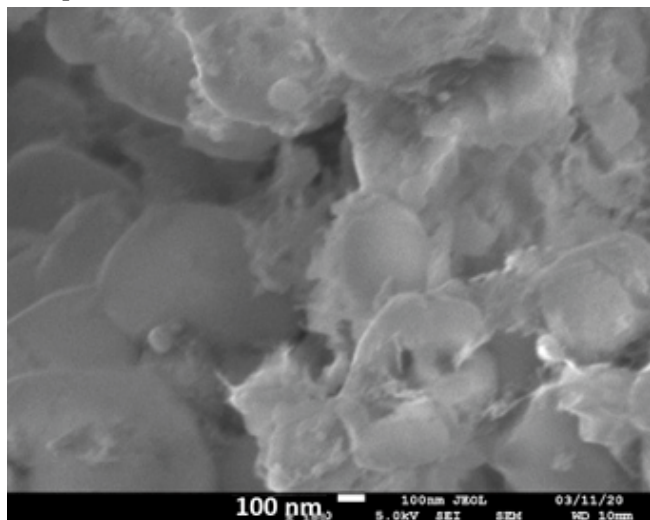

4 smpl. After

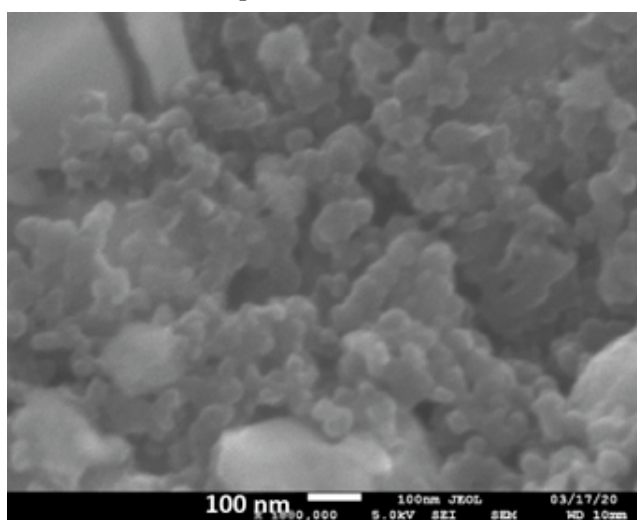

4 smpl. Before

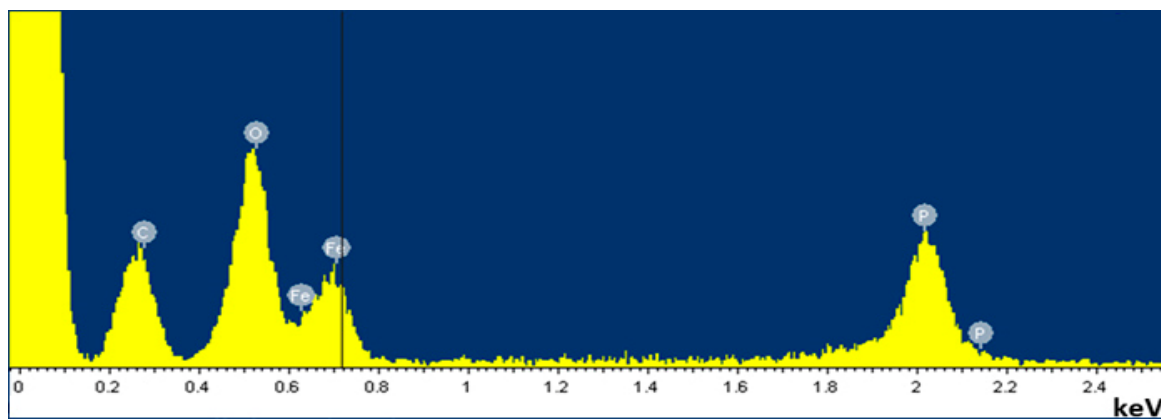

| Element | Conv. | Intensity Correct. | Weight % | Weight % Sigma | Atomic % |
|---------|-------|--------------------|----------|----------------|----------|
| C K     | 18.16 | 0.7755             | 30.07    | 1.33           | 49.73    |
| O K     | 22.21 | 1.1919             | 23.95    | 0.99           | 29.74    |
| P K     | 7.74  | 0.6818             | 14.59    | 0.68           | 9.36     |
| Fe K    | 19.67 | 0.8052             | 31.39    | 2.02           | 11.17    |
| Total   |       |                    | 100.00   |                |          |

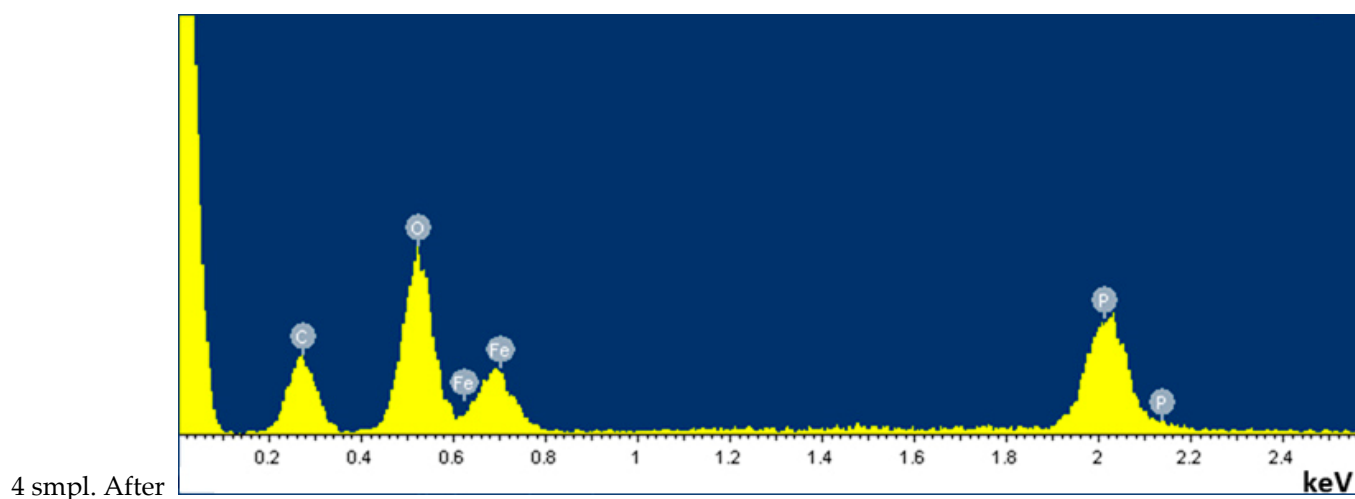

| Element | Conv<br>. | Intensity<br>Correct. | Weight % | Weight %<br>Sigma | Atomic % |
|---------|-----------|-----------------------|----------|-------------------|----------|
| C K     | 12.36     | 0.7003                | 24.19    | 0.91              | 42.55    |
| O K     | 22.64     | 1.2497                | 24.84    | 0.76              | 32.80    |
| P K     | 8.86      | 0.6874                | 17.68    | 0.59              | 12.06    |
| Fe K    | 19.83     | 0.8167                | 33.29    | 1.56              | 12.59    |
| Total   |           |                       | 100.00   |                   |          |
